1 **Quality of newborn care and associated factors: An analysis of the 2022 Kenya demographic**  
2 **and health survey.**

3  
4 John Baptist Asiimwe<sup>1\*</sup>, Earnest Amwiine<sup>2</sup>, Angella Namulema<sup>3</sup>, Quraish Sserwanja<sup>4</sup>, Joseph  
5 Kawuki<sup>5</sup>, Mathius Amperiize<sup>6</sup>, Shamim Nabidda<sup>1</sup>, Imelda Nmaatovu<sup>7</sup>, Lilian Nuwabaine<sup>1</sup>

6 <sup>1</sup> Aga Khan University, Uganda Campus. P. O. Box 8842, Kampala, Uganda

7 <sup>2</sup> Faculty of Medicine, Mbarara University of Science and Technology P.O. Box 1410, Mbarara,  
8 Uganda

9 <sup>3</sup> Mbarara Regional Referral Hospital, P.O. Box: 40 Mbarara, Uganda

10 <sup>4</sup> Programmes Department, Relief International, Khartoum, Sudan

11 <sup>5</sup> Department of Family, Population, & Preventive Medicine, Stony Brook University, New York,  
12 United States of America.

13 <sup>6</sup> Infectious Diseases Institute, Kampala, Uganda

14 <sup>7</sup> Makerere University, Kampala, Uganda

15 \* Correspondence to [john.asiimwe@aku.edu](mailto:john.asiimwe@aku.edu)

16

17

18

19

20

21

22

23

24

25

26

27

28

29

30

31

32

33 **Abstract**

34 **Background**

35 Kenya is one of the African countries that have pledged to reduce neonatal death as per the World  
36 Health Organization set target by 2030. Providing high-quality newborn care is critical in  
37 minimizing neonatal mortality. The purpose of this study was to determine the factors that  
38 influence the quality of newborn care in Kenya.

39 **Methods**

40 Secondary data from 11,863 participants of the Kenya Demographic and Health Survey (KDHS)  
41 2022 were analyzed. The participants were chosen using a two-stage stratified sampling method.  
42 The quality of newborn care was operationalized as receiving all components of newborn care  
43 after childbirth, as reported by the mother. To identify the factors associated with the quality of  
44 newborn care, multivariable logistic regression was carried out using SPSS (version 20).

45 **Results**

46 In this study, 32.7% (95% CI: 31.0-34.5) of the mothers reported that their newborns had received  
47 all components of quality neonatal care after childbirth. Mothers who subscribed to the Christian  
48 (3.60 (95%CI: 1.32-9.83) or Muslim faith (3.88 (95%CI: 1.29-11.67) compared with those from  
49 other faiths, were more likely to report that their newborns had received quality newborn care.  
50 Mothers who spent an average of one hour accessing the health facilities compared with those who  
51 spent less than half an hour were 1.33 (95%CI: 1.01-1.75) times more likely to report that their  
52 newborns had received quality newborn care. Mothers who gave birth in a non-government  
53 organization health facility were 30.37 (95%CI: 2.69-343.20) times more likely to report that their  
54 newborns had received quality newborn care compared with those who delivered from a faith-  
55 based organization.

56 On the contrary, in terms of regions, Mothers who lived in Nyanza, Eastern, and Rift Valley  
57 provinces compared with those who lived in the coastal regions were 0.53 (95%CI: 0.34-0.82),  
58 0.61 (95%CI: 0.39-0.94), and 0.62 (95%CI: 0.41-0.93) times less likely to report that their  
59 newborns had received quality newborn care, respectively. Finally, mothers who gave birth  
60 through cesarean section were 0.44 (95%CI: 0.32-0.61) times less likely to report that their  
61 newborns had received quality newborn care than mothers who gave birth through spontaneous  
62 vaginal delivery.

63

64

## 65 **Conclusion**

66 The study indicates about a third of the neonates (1 in 3) received quality newborn care. This  
67 study seems to suggest that facility-related and parental social factors are associated with receiving  
68 quality newborn care. Several stakeholders including health care providers may need to pay more  
69 attention to newborn babies whose mothers come from marginalized regions of the country,  
70 minority religious faith denominations, and those delivered by cesarean section. Stakeholders  
71 should focus on strengthening collaborations with NGO health facilities and achieving universal  
72 health coverage to improve the quality of neonatal care. Also, the government could utilize  
73 minority faith denominations as an avenue for staging sensitization about quality neonatal health  
74 services.

## 75 **Keywords**

76 Newborn care; Quality; associated factors; Kenya

77

## 78 **Introduction**

79 Quality of newborn care is the safe and efficient healthcare delivered on time to improve the health  
80 outcomes of newborns [1]. Quality newborn care is critical in assisting babies to adapt to the  
81 extrauterine environment, thus, reducing neonatal death by 25% [2]. The World Health  
82 Organization (WHO) emphasizes the importance of ensuring quality care for neonates during the  
83 postpartum period as recommended in the form of assessing the newborn's temperature, checking  
84 the umbilical cord, counseling, and observing the mother on breastfeeding [3]. Some other  
85 components of quality neonatal care include the management of hypothermia, management of  
86 neonatal sepsis and other medical conditions, birth from a skilled attendant and the health facility,  
87 examination of the baby, skin-to-skin care, and immunization [4, 5]

88 Despite the decline in under-five mortality worldwide in response to efforts to address it, deaths  
89 remain concentrated in the very first days of life indicating the need to attend to quality neonatal  
90 care demands[6]. The World Health Organization estimated approximately 2.4 million newborn  
91 deaths in 2019, which accounted for over 45% of under-five deaths worldwide. Additionally, a  
92 persistent slow reduction in newborn mortality was also reported in the East African region [7].  
93 The first 28 days of life present a very crucial period when babies are most vulnerable to health

94 challenges and face a higher risk of death with the global mortality rate standing at 17 deaths per  
95 1,000 live births in 2022 [8]. However, the rate is rather higher in sub-Saharan countries (Kenya  
96 inclusive), which contributes almost 57% of the worldwide mortality rate, with rates of 21 deaths  
97 per 1000 live births in low and middle-income countries [1, 9, 10]. All these mortality rates exceed  
98 the projected sustainable development goal target of 12 deaths for every 1000 live births by 2030.  
99 [11].

100 The high newborn mortality rate is attributed to poor quality newborn care which includes delayed  
101 initiation of breastfeeding [12-14]. Above all, providing quality newborn care has been reported  
102 to be low in African countries like Kenya where the neonatal mortality rate is still a healthcare  
103 challenge accounting for 40% of under-five mortality rates [15-18]. In Sub-Saharan Africa,  
104 challenges to delivering newborn care are multi-faceted and include poor healthcare infrastructure,  
105 social-cultural environments, lack of adherence to clinical guidelines, and inadequate political will  
106 by governments[19-21]. The World Health Organization guidelines on postnatal care emphasize  
107 the provision of quality newborn care as a means of reducing preventable neonatal mortality [22].

108 Evidence from the literature indicated that the level of education, monthly income, age of the  
109 mother, number of antenatal visits, and knowledge of newborn care by the mothers were some of  
110 the factors associated with the quality of newborn care [23-25]. Other sociocultural determinants  
111 of the quality of newborn care include residency, maternal employment, pregnancy intention,  
112 health facility accessibility, occupation, parity, and counseling during the perinatal period.[26-29].  
113 Furthermore, healthcare system-related factors related to the quality of neonatal care include the  
114 presence of health workers at workstations, access to evidence-based guidelines, working  
115 environment, communication skills, and supervision [30].

116 To achieve the sustainable development target 3.2 of eliminating unnecessary deaths of newborns  
117 and children under the age of five, there is a need to monitor the quality of newborn care delivered  
118 by healthcare providers in countries with limited resources like Kenya where neonatal mortality is  
119 still high [22]. Some studies that have been used to draw recommendations in Kenya like  
120 prioritizing the need to strengthen existing facilities, increasing access to standard inpatient  
121 neonatal care, and developing effective referral systems to improve neonatal care, [31] are not  
122 conducted on nationally representative populations. Therefore, this study aimed to identify the  
123 factors associated with the quality of newborn care as reported by the mothers using nationally

124 representative data from Kenya. Identifying these factors is crucial in developing efficient  
125 interventions to combat neonatal mortality and morbidity in Kenya and sub-Saharan Africa at  
126 large.

## 127 **Methods**

### 128 **Data source, sample design, and collection**

129 This study used data from the 2022 Kenya Demographic and Health Survey (KDHS). The survey  
130 used a two-stage stratified sampling approach in which the first step involved using equal  
131 probabilities and random selection to choose 1692 clusters from a master sample frame of 129,067  
132 clusters taken from the 2019 Kenya population and housing census. The second stage entailed  
133 house listing to create a sampling frame whereby 25 households for each cluster were chosen. If a  
134 cluster contained fewer than 25 households, all of them were sampled. In total, 1691 clusters were  
135 surveyed. The Inner-City Fund (ICF) aided with the training of data collectors and pre-testing of  
136 study materials. Data was collected from February to July 2022.

137 All women between 15 and 49 years who were either regular members of the selected families or  
138 had resided in those homes the night preceding the survey were interviewed about newborn care  
139 in English or Swahili. Out of 32,156 women who responded to the questionnaire, 11,863 had  
140 recently given birth within the previous five years [10]. The MEASURE DHS website  
141 (<https://www.dhsprogram.com/data/available-datasets.cfm>) gave us specific permission to utilize  
142 the 2022 KDHS dataset. Although the dataset comprised several variables, only those that were  
143 relevant to our research were included in the analysis.

144

### 145 **Study variables.**

#### 146 **Dependent/outcomes**

147 The main outcome variable in this study was the mothers' reported quality of newborn care. The  
148 quality of newborn care was an aggregate variable estimated from several binary outcomes (yes or  
149 no), which included whether the newborn received certain services from medical professionals  
150 after birth, as reported by their mother. The services included obtaining delivery assistance from a  
151 skilled health provider, weighing the newborn, taking the newborn's temperature, placing the

152 newborn on the mother's breast within the first hour after delivery, observing the mother while  
153 breastfeeding their newborns, teaching the mother ways to clean the baby's umbilical cord,  
154 examining the newborn's umbilical cord, advising the mothers regarding risk indicators of  
155 neonatal illness (danger signs), and guiding or counseling the mother on breastfeeding. As reported  
156 by the mother, receiving all the newborn care services implied that one had received quality  
157 newborn care (yes) or not (no), if one skipped  $\geq 1$  of the 9 services. [20, 32-34].

## 158 **Independent variables**

159 Based on the existing literature and the availability of the data in DHS, the factors taken into  
160 account in the analysis were classified into three categories: parental, health facility, obstetric, and  
161 child-related characteristics [16, 20, 33, 35, 36]. The analysis examined 11 parental factors such  
162 as the age of the mother (35-49, 20-34, 15-19 years), residence (urban or rural), maternal and  
163 husband education (tertiary, none/primary, secondary), region (Nyanza, Eastern, Rift Valley,  
164 Nairobi, Coast, Central, Western Northeastern), maternal and husband working status (yes or no),  
165 and religion (Christian, Muslim, or others). The wealth index was generated from the 2022 KDHS  
166 data on household ownership of assets using the principal component analysis and categorized into  
167 5 categories (poorest to richest). Whereas maternal autonomy was measured using two proxy  
168 variables: who heads the family (male or female) and who makes healthcare decisions for the  
169 mother/participant (self, partner, together with partner or someone else, or others). We included  
170 ten health facility, obstetric, and child-related factors in the analysis. Obstetric factors comprised  
171 pregnancy wantedness (no or yes), ages at first birth in 5-year age groups, antenatal (ANC) visits  
172 ( $\geq 4$  or  $\leq 3$ ), mode of delivery (cesarean or vaginal), the birth interval in months ( $\leq 24$  or  $\geq 25$ ) and  
173 pregnancy losses ( $\geq 1$  or 0). Child factors included the sex of the child (male or female). Lastly,  
174 health facility factors included the specific place of childbirth (private, public, clinics, faith-based  
175 organizations, and Non-governmental Organizational health facilities). The analysis considered  
176 minutes to a healthcare facility of birth ( $\leq 30$ , 31-60,  $\geq 61$ ) as a proxy for access to the facility.

## 177 **Statistical analysis**

178 Before analyzing the data, it was cleansed, and dummy variables were developed. Descriptive  
179 statistics such as percentages were generated at the univariate level for all the categorical variables.  
180 We computed univariate logistic regression analyses, to find independent factors related to  
181 neonatal care quality. To investigate the factors correlated with newborn care quality while

182 adjusting for other variables, any variables with P-values below 0.05 were added in a simple  
183 multivariate logistic regression model. The confidence intervals corresponding to 95% for all odd  
184 ratios are presented. The data was analyzed using SPSS's complex samples module (V20), which  
185 accounted for the complex sample design present in DHS data.

186 The complex sample package provides accurate parameter estimates by accounting for clustering,  
187 weighting, and sample stratification that occurred during the study participants' selection. [37, 38].  
188 The sample weights were also added to all frequencies calculated to ensure the representativeness  
189 of the study results and account for unequal probability sampling across various strata [37]. A  
190 variance inflation factor (VIF) of less than 10 was utilized as a criterion to test multi-collinearity  
191 among all predictor variables in the model, during preliminary analyses [37, 38].

## 192 **Ethical consideration**

193 The Inner-City Fund (ICF) Institutional Review Board gave ethical clearance to conduct the  
194 KDHS. The Kenya National Bureau of Statistics conducted the study in partnership with other  
195 stakeholders. Given that the secondary data was publicly available, no ethical authorization was  
196 required to investigate it. However, MEASURE DHS provided access to the 2022 KDHS datasets.  
197 (<https://www.dhsprogram.com/data/available-datasets.cfm>). Human participants provided written  
198 informed permission, as did legally designated representatives of minor participants.

199

## 200 **Results**

### 201 **Demographic characteristics of the mothers of the newborn babies**

202 DHS data about the quality of newborn care was obtained from 11,863 women who had recently  
203 given birth within five years preceding the survey (Table 1). The majority (74.4%) of women were  
204 aged 20 to 34, were from Eastern, Nairobi, Rift Valley, Central, and Nyanza provinces (76.7%),  
205 and lived in rural regions (61.4%). Moreover, 40% belonged to the richer (21.2%) and richest  
206 (22.7%) quintiles. The majority were Christian (88.5%), had completed at most secondary  
207 education (80.5%), and were working (57.3%). Furthermore, the majority of the participants'  
208 spouses were employed (91%), and 55.9% had completed their secondary education. The majority  
209 of participants (71.5%) lived in male-headed households and decided to seek health care services



210 alongside their spouses or someone else (44.9%). Most participants gave birth while they were  
 211 under 24 years old (87.1%), had a pregnancy interval of not less than two years following their  
 212 previous delivery (75.4%), desired to have the most recent pregnancy (91.2%), recorded at most  
 213 four total antenatal visits (67.2%), and lived within 30minutes from the health facilities (73.1).  
 214 Most mothers gave birth to newborn babies by vaginal birth (82.9%), and at public health facilities  
 215 (65.2%). About half of neonates were male sex (51%). Additionally, fewer participants had  
 216 pregnancy loss (23%).

217

218 **Table 1. Demographic characteristics of the mothers of the newborn babies (Respondents)**

| <b>Variable</b>                  | <b>n (weighted %)</b> |
|----------------------------------|-----------------------|
| <b>Age (years)</b>               |                       |
| 15-19                            | 785 (6.6)             |
| 20-34                            | 8825(74.4)            |
| 35-49                            | 2253 (19)             |
| <b>Region/Province</b>           |                       |
| Nairobi                          | 1371 (11.6)           |
| Northeastern                     | 406 (3.4)             |
| Coast                            | 1107 (9.3)            |
| Western                          | 1253 (10.6)           |
| Eastern                          | 1336 (11.3)           |
| Central                          | 1380 (11.6)           |
| Nyanza                           | 1406 (11.8)           |
| Rift Valley                      | 3605 (30.4)           |
| <b>Residence</b>                 |                       |
| Rural                            | 7289 (61.4)           |
| Urban                            | 4574 (38.6)           |
| <b>Working status/occupation</b> |                       |
| Not working                      | 5063 (42.7)           |
| Working                          | 6791 (57.3)           |
| <b>Education</b>                 |                       |
| Tertiary                         | 2321 (19.6)           |
| Secondary                        | 4231 (35.7)           |
| None/primary                     | 5311 (44.8)           |
| <b>Wealth index</b>              |                       |
| Richest                          | 2695 (22.7)           |
| Richer                           | 2510 (21.2)           |
| Middle                           | 2074 (17.5)           |
| Poorer                           | 2062 (17.4)           |
| Poorest                          | 2523 (21.3)           |
| <b>Religion</b>                  |                       |



|                                              |              |
|----------------------------------------------|--------------|
| Muslims                                      | 1120 (9.7)   |
| Christians                                   | 10220 (88.5) |
| Others                                       | 209 (1.8)    |
| <b>Sex of household head</b>                 |              |
| Female                                       | 3380 (28.5)  |
| Male                                         | 8483 (71.5)  |
| <b>Husband education</b>                     |              |
| Tertiary                                     | 2329 (24.5)  |
| Secondary                                    | 2984 (31.4)  |
| None/primary                                 | 4206 (44.2)  |
| <b>Husband's working status</b>              |              |
| Not working                                  | 858 (9)      |
| Working                                      | 8632 (91)    |
| <b>Health seeking decision making</b>        |              |
| Joint                                        | 4279 (44.9)  |
| Partner                                      | 1590 (16.7)  |
| Self                                         | 3618 (38.5)  |
| Others                                       | 32 (0.3)     |
| <b>Age at first birth (years)</b>            |              |
| ≥35                                          | 57 (0.5)     |
| 30-34                                        | 229 (2.0)    |
| 25-29                                        | 1215 (10.4)  |
| 20-24                                        | 4630 (39.8)  |
| ≤19                                          | 5503 (47.3)  |
| <b>ANC Visits</b>                            |              |
| ≤3                                           | 3157 (32.8)  |
| ≥4                                           | 6472 (67.2)  |
| <b>Pregnancy wanted</b>                      |              |
| No                                           | 1041 (8.8)   |
| Yes                                          | 10823 (91.2) |
| <b>Preceding pregnancy interval (months)</b> |              |
| ≥25                                          | 6475 (75.4)  |
| ≤24                                          | 2111 (24.6)  |
| <b>Place of delivery</b>                     |              |
| FBO                                          | 574 (5.4)    |
| NGO                                          | 31 (0.3)     |
| Private health facility                      | 1796 (16.9)  |
| Public health facility                       | 6927 (65.2)  |
| Home                                         | 1246 (11.7)  |
| Others                                       | 55 (0.5)     |
| <b>Mode of last delivery</b>                 |              |
| Vaginal                                      | 9043 (82.9)  |
| Cesarean section                             | 1867 (17.1)  |
| <b>Time to the health facility (minutes)</b> |              |
| ≥61                                          | 496 (8)      |

|                         |             |
|-------------------------|-------------|
| 31-60                   | 1168 (18.9) |
| ≤30                     | 4515 (73.1) |
| <b>Sex of child</b>     |             |
| Female                  | 5121 (49.0) |
| Male                    | 5333 (51.0) |
| <b>Pregnancy losses</b> |             |
| ≥1                      | 2723 (23.0) |
| None                    | 9140 (77.0) |

219

220 **Quality of newborn care**

221 Overall, 32.7% of the mothers reported that their newborns had received all components of  
 222 neonatal care (quality newborn care) after childbirth (Table 2). Among the components of newborn  
 223 care, 90.4% of the mothers reported that their newborns were delivered by a skilled health provider,  
 224 78.1 % had their newborn’s umbilical cord examined by a health care worker, 88.2% were  
 225 weighed, and had their temperature taken (72%). In addition, 59.8% of neonates were placed on  
 226 the mother's breast by a medical professional within the first hour of birth. Participating mothers  
 227 were instructed on ways to clean their newborn's umbilical cords (73.9%), observed during  
 228 breastfeeding babies by medical professionals (75.8%), and given breastfeeding counseling  
 229 (77.6%) or information about danger signs related to newborn sickness (77.6%).

230 **Table 2. Components of newborn care package received.**

| Variable                                                 | N    | Weighed % (95% CI) |
|----------------------------------------------------------|------|--------------------|
| <b>Quality of newborn care (overall)</b>                 | 1503 | 32.7 (31.0-34.5)   |
| Baby placed on mother’s breast within 1 hour after birth | 3267 | 59.8 (57.7-61.8)   |
| Delivered by a skilled health provider                   | 9463 | 90.4 (89.6-91.2)   |
| Examined the cord                                        | 3811 | 78.1 (76.6-79.5)   |
| Showed how to clean the cord                             | 3609 | 73.9 (72.3-75.5)   |
| Measured temperature                                     | 3515 | 72.0 (70.3-73.6)   |
| Advise on a baby who needs medical attention             | 3205 | 65.6 (63.8-67.4)   |
| Breastfeeding counselling                                | 3788 | 77.6 (76.1-79.0)   |
| Observed breastfeeding                                   | 3704 | 75.8 (74.3-77.3)   |
| Weighing the baby                                        | 4717 | 88.2 (87.1-89.3)   |

231 **Factors associated with the quality of newborn care.**

232 **Table 3** summarizes the factors associated with the quality of neonatal care in logistic regression  
 233 analysis. In multivariate logistic regression, mothers who subscribed to the Christian (3.60

234 (95%CI: 1.32-9.83) or Muslim faith (3.88 (95%CI: 1.29-11.67) compared with those from other  
 235 faiths, were more likely to report that their newborns had received quality newborn care. Mothers  
 236 who spent an average of one hour accessing the health facilities compared with those who spent  
 237 less than half an hour were 1.33 (95%CI: 1.01-1.75) times more likely to report that their newborns  
 238 had received quality newborn care. Mothers who gave birth in a non-government organization  
 239 health facility were 30.37 (95%CI: 2.69-343.20) times more likely to report that their newborns  
 240 had received quality newborn care compared with those who delivered from a faith-based  
 241 organization.

242 On the contrary, in terms of regions, mothers who lived in Nyanza, Eastern, and Rift Valley  
 243 provinces compared with those who lived in the coastal regions were 0.53 (95%CI: 0.34-0.82),  
 244 0.61 (95%CI: 0.39-0.94), and 0.62(95%CI: 0.41-0.93) times less likely to report that their  
 245 newborns had received quality newborn care, respectively. Finally, mothers who gave birth via  
 246 cesarean section were 0.44 (95%CI: 0.32-0.61) times less likely to report that their babies received  
 247 quality newborn care than those who gave birth via spontaneous vaginal delivery.

248 **Table 3: Factors associated with the quality of neonatal care received by neonates of mothers**  
 249 **aged 15-49 years.**

| Variable               | Quality Neonatal care |             | CORs (95%CI)     | P-value | AORs(95%CI) | p-value |
|------------------------|-----------------------|-------------|------------------|---------|-------------|---------|
|                        | Yes (%)               | No (%)      |                  |         |             |         |
| <b>Age (years)</b>     |                       |             |                  | 0.482   |             |         |
| 15-19 (Ref.)           | 93 (2.0)              | 229 (5.0)   | 1                |         | -           |         |
| 20-34                  | 1155 (25.1)           | 2358 (51.3) | 1.20 (0.87-1.66) |         | -           |         |
| 35-49                  | 255 (17.0)            | 510 (16.5)  | 1.23 (0.86-1.74) |         | -           |         |
| <b>Residence</b>       |                       |             |                  | 0.475   | -           |         |
| Rural (Ref.)           | 924 (20.1)            | 1967 (42.8) | 1                |         | -           |         |
| Urban                  | 580 (12.6)            | 1129 (24.6) | 1.09 (0.92-1.31) |         | -           |         |
| <b>Region/Province</b> |                       |             |                  | 0.001   |             | 0.003   |

|                                      |                |                |                                |        |                                 |       |
|--------------------------------------|----------------|----------------|--------------------------------|--------|---------------------------------|-------|
| Coast (Ref.)                         | 156<br>(3.4)   | 274<br>(6.0)   | 1                              |        | -                               |       |
| Northeastern                         | 25 (0.5)       | 115<br>(2.5)   | 0.92 (0.53-<br>1.60)           |        | 0.57 (0.32-<br>1.01)            |       |
| Eastern                              | 169<br>(3.7)   | 385<br>(8.4)   | 0.68 (0.44-<br>1.04)           |        | <b>0.61 (0.39-<br/>0.94) *</b>  |       |
| Central                              | 185<br>(7.1)   | 327<br>(3.3)   | 0.89 (0.55-<br>1.44)           |        | 0.99(0.60-<br>1.63)             |       |
| Rift Valley                          | 410<br>(8.9)   | 978<br>(21.2)  | 0.82 (0.54-<br>1.24)           |        | <b>0.62(0.41-<br/>0.93) *</b>   |       |
| Western                              | 198<br>(4.3)   | 277<br>(6.0)   | 1.24 (0.78-<br>1.96)           |        | 0.89(0.57-<br>1.43)             |       |
| Nyanza                               | 166<br>(3.6)   | 379<br>(8.23)  | <b>0.56 (0.35-<br/>.87) *</b>  |        | <b>0.53 (0.34-<br/>0.82) *</b>  |       |
| Nairobi                              | 193<br>(4.2)   | 362<br>(7.9)   | 0.69 (0.36-<br>1.33)           |        | 0.59 (0.32-<br>1.12)            |       |
| <b>Education</b>                     |                |                |                                | 0.003  |                                 | 0.466 |
| None/primary<br>(Ref.)               | 590<br>(12.8)  | 1445<br>(31.4) | 1                              |        | 1                               |       |
| Secondary                            | 595<br>(12.9)  | 1104<br>(24.0) | <b>1.32 (1.10-<br/>1.59)</b>   |        | 1.15(0.88-<br>1.49)             |       |
| Tertiary                             | 319<br>(6.9)   | 547<br>(11.9)  | <b>1.43 (1.10-<br/>1.85)</b>   |        | 1.26 (0.81-<br>1.96)            |       |
| <b>Wealth index</b>                  |                |                |                                | <0.001 |                                 | 0.332 |
| Poorest (Ref.)                       | 216<br>(4.7)   | 734<br>(16.0)  | 1                              |        | 1                               |       |
| Poorer                               | 275<br>(6.0)   | 551<br>(12.0)  | <b>1.69 (1.35-<br/>2.13)</b>   |        | 1.18 (0.85-<br>1.63)            |       |
| Middle                               | 302<br>(6.6)   | 517<br>(11.2)  | <b>1.99 (1.59-<br/>2.49)</b>   |        | 1.16 (0.83-<br>1.62)            |       |
| Richer                               | 398<br>(8.7)   | 625<br>(13.6)  | <b>2.17 (1.70-<br/>2.77)</b>   |        | 1.31(0.89-<br>1.91)             |       |
| Richest                              | 312<br>(6.8)   | 671<br>(14.6)  | <b>1.59 (1.21-<br/>2.08)</b>   |        | 0.91 (0.58-<br>1.41)            |       |
| <b>Religion</b>                      |                |                |                                | 0.009  |                                 | 0.040 |
| Christians                           | 1349<br>(30.1) | 2650<br>(59.1) | <b>2.91 (1.46-<br/>5.79)*</b>  |        | <b>3.60 (1.32-<br/>9.83) *</b>  |       |
| Muslims                              | 117<br>(2.6)   | 303<br>(6.8)   | <b>2.21 (1.04-<br/>4.70)*</b>  |        | <b>3.88 (1.29-<br/>11.67) *</b> |       |
| Others (Ref.)                        | 10 (0.2)       | 58 (1.3)       | 1                              |        | 1                               |       |
| <b>Working<br/>status/occupation</b> |                |                |                                | 0.025  |                                 | 0.665 |
| Not working<br>(Ref.)                | 591<br>(12.9)  | 1363<br>(29.7) | 1                              |        | 1                               |       |
| Working                              | 910<br>(19.8)  | 1731<br>(37.7) | <b>1.21 (1.03-<br/>1.44) *</b> |        | 1.05 (0.84-<br>1.31)            |       |

|                                            |             |              |                              |        |                  |       |
|--------------------------------------------|-------------|--------------|------------------------------|--------|------------------|-------|
| <b>Husband Education</b>                   |             |              |                              | 0.004  |                  | 0.490 |
| None/primary (Ref.)                        | 466 (12.8)  | 1130 (30.9)  | 1                            |        | 1                |       |
| Secondary                                  | 393 (10.7)  | 766 (21.0)   | <b>1.24 (1.02-1.51) *</b>    |        | 1.07 (0.82-1.41) |       |
| Tertiary                                   | 342 (9.4)   | 557 (15.2)   | <b>1.490 (1.162-1.910) *</b> |        | 1.28 (0.85-1.92) |       |
| <b>Husband's Working status/occupation</b> |             |              |                              | <0.001 |                  | 0.240 |
| Not working (Ref.)                         | 59 (1.6)    | 247 (6.8)    | 1                            |        | 1                |       |
| Working                                    | 1134 (31.1) | 2203 (60.5)  | <b>2.15 (1.64-2.81)</b>      |        | 1.23 (0.87-1.74) |       |
| <b>Sex of Household head</b>               |             |              |                              | 0.668  |                  |       |
| Male (Ref.)                                | 1074 (23.3) | 2187 (47.5r) | 1                            |        | -                |       |
| Female                                     | 430 (9.3)   | 910 (19.8)   | 0.96 (0.81-1.15)             |        | -                |       |
| <b>Health seeking decision making</b>      |             |              |                              | 0.014  |                  | 0.557 |
| Self (Ref.)                                | 490 (13.4)  | 926 (25.4)   | 1                            |        | 1                |       |
| Partner                                    | 143 (3.9)   | 421 (11.5)   | <b>0.64 (0.49-0.84) *</b>    |        | 0.81 (0.58-1.14) |       |
| Joint                                      | 563 (15.4)  | 1099 (30.1)  | 0.97(0.79-1.19)              |        | 1.02 (0.79-1.31) |       |
| Others                                     | 0 (0)       | 7 (0.2)      | 1.24 0.29-5.42               |        | 1.15 (0.19-7.12) |       |
| <b>ANC Visits</b>                          |             |              |                              | 0.002  |                  | 0.443 |
| ≤3 (Ref.)                                  | 418 (9.1)   | 1046 (22.7)  | 1                            |        | 1                |       |
| ≥4                                         | 1085 (23.6) | 2051 (44.6)  | <b>1.32 (1.11-1.58) *</b>    |        | 1.09 (0.86-1.39) |       |
| <b>Age at first birth (years)</b>          |             |              |                              | 0.589  |                  |       |
| ≤19 (Ref.)                                 | 707 (15.4)  | 1499 (32.6)  | 1                            |        | -                |       |
| 20-24                                      | 602 (13.1)  | 1236 (26.9)  | 1.03 (0.86-1.24)             |        | -                |       |
| 25-29                                      | 157 (3.4)   | 307 (6.7)    | 1.09 (0.79-1.49)             |        | -                |       |

|                                              |             |             |                         |        |                              |        |
|----------------------------------------------|-------------|-------------|-------------------------|--------|------------------------------|--------|
| 30-34                                        | 33 (0.7)    | 52 (1.1)    | 1.34 (0.74-2.44)        |        | -                            |        |
| ≥35                                          | 5(0.1)      | 3 (0.1)     | 3.10 (0.81-11.81)       |        | -                            |        |
| <b>Preceding pregnancy interval (months)</b> |             |             |                         | 0.051  |                              | 0.154  |
| ≤24 (Ref.)                                   | 223 (6.7)   | 562 (16.8)  | 1                       |        | 1                            |        |
| ≥25                                          | 860 (25.7)  | 1701 (50.8) | <b>1.273(0.99-1.62)</b> |        | 1.20 (0.93-1.55)             |        |
| <b>Pregnancy wanted</b>                      |             |             |                         | 0.239  |                              |        |
| No (Ref.)                                    | 144 (3.1)   | 255 (5.6)   | 1                       |        | -                            |        |
| Yes                                          | 1360 (29.6) | 2841 (61.8) | 0.85 (0.65-1.11)        |        | -                            |        |
| <b>Mode of last delivery</b>                 |             |             |                         | <0.001 |                              | <0.001 |
| Vaginal (Ref.)                               | 1315 (28.6) | 2494 (54.2) | 1                       |        | 1                            |        |
| Cesarean section                             | 188 (4.1)   | 603 (13.1)  | <b>0.59 (0.45-0.78)</b> |        | <b>0.44 (0.32-0.61) *</b>    |        |
| <b>Place of delivery</b>                     |             |             |                         | <0.001 |                              | <0.001 |
| FBO (Ref.)                                   | 103 (2.2)   | 167 (3.6)   | 1                       |        | 1                            |        |
| Public health facility                       | 1118 (24.3) | 1906 (41.4) | 0.95 (0.63-1.42)        |        | 1.06 (0.64-1.79)             |        |
| Private health facility                      | 257 (5.6)   | 561 (12.2)  | 0.74 (0.46-1.19)        |        | 0.95 (0.50-1.79)             |        |
| NGO                                          | 11 (0.2)    | 5 (0.1)     | 3.40 (0.39-29.51)       |        | <b>30.37 (2.69-343.20) *</b> |        |
| Others                                       | 3 (0)       | 20 (0.4)    | 0.22 (0.041-1.13)       |        | 0.30 (0.06-1.60)             |        |
| <b>Pregnancy losses</b>                      |             |             |                         | 0.569  |                              |        |
| None (Ref.)                                  | 1319 (28.7) | 2694 (58.6) | 1                       |        | -                            |        |
| ≥1                                           | 184 (4.0)   | 403 (8.8)   | 0.94- (0.74-1.18)       |        | -                            |        |
| <b>Time to the health facility (minutes)</b> |             |             |                         | 0.006  |                              | 0.125  |
| ≤30 (Ref.)                                   | 293 (6.4)   | 584 (12.7)  | 1                       |        | 1                            |        |

|                     |                |                |                                |       |                                |  |
|---------------------|----------------|----------------|--------------------------------|-------|--------------------------------|--|
| 31-60               | 1124<br>(24.4) | 2236<br>(48.6) | 1.00 (0.83-<br>1.21)           |       | <b>1.33 (1.01-<br/>1.75) *</b> |  |
| ≥61                 | 86 (1.9)       | 277<br>(6.0)   | <b>0.62 (0.46-<br/>0.83) *</b> |       | 1.09 (0.74-<br>1.60)           |  |
| <b>Sex of child</b> |                |                |                                | 0.736 |                                |  |
| Female (Ref.)       | 734<br>(16.0)  | 1535<br>(33.4) | 1                              |       |                                |  |
| Male                | 769<br>(16.7)  | 1562<br>(33.9) | 1.03 (0.89-<br>1.22)           |       | -                              |  |

250 *Note.* —not evaluated in that model, \* = significant at 0.05, **Bold**= significant, CI= confidence  
 251 interval, NGO= nongovernmental organization, ANC= antenatal care, FBO= faith-based  
 252 organizations, AORs=adjusted odds ratios, CORs= crude odd ratios, Ref.=reference category.

253

254

## 255 Discussion

256 The study determined the factors associated with the quality of newborn care in Kenya using the  
 257 2022 KDHS. Overall, 32.7% of the mothers reported that their newborns had received all  
 258 components of neonatal care (quality newborn care) after childbirth. These results are lower  
 259 compared to the overall quality of neonatal care reported in Ethiopia at 66.3% and 38.4%  
 260 respectively [39, 40]. Among the components of neonatal care, 90.4% of the newborns were  
 261 delivered by a skilled health provider. This is higher than 86% recorded globally [41], 79.2%, and  
 262 51.8% recorded in Benin and Kembata, Ethiopia, respectively [42, 43]. However, 78.1 % had their  
 263 newborn’s umbilical cord examined by a healthcare worker which is similar to 75.4% and 70.3%  
 264 recorded in Ethiopia and Senegal respectively [39, 44]. 73.9% of participating mothers were shown  
 265 how to clean their umbilical cord higher than 66% recorded in Wakiso, Uganda [45]. Additionally,  
 266 59.8% of the newborns were placed on the mother’s breast within 1 hour after birth by a healthcare  
 267 worker, higher than the global rate of 45% [46], 29.4%, and 47.8% recorded in Senegal and India  
 268 respectively [44, 47],

269 In this study, 75.8% of mothers were observed while breastfeeding their newborns by health care  
 270 professionals, while 77.6% received breastfeeding counseling which is higher compared to 31.9%  
 271 recorded in a study by Hassounah et al. [48]. In this study, 77.6% of mothers were counseled about  
 272 danger signs associated with newborn illness (77.6%), 88.2% were weighed and 72% had their  
 273 temperature taken. In sum, although the overall quality of newborn care reported by the mothers



274 appears low, statistics about specific components of that care paint a seemingly positive picture of  
275 a better quality of newborn care in Kenya when compared to previous studies, which can be  
276 attributed to several initiatives by the government of Kenya to improve maternal and child health  
277 care such as the free maternal and newborn care policy [49, 50].

278 Mothers who lived in Nyanza, Eastern, and Rift Valley provinces compared with those who lived  
279 in the coastal regions were less likely to report that their newborns had received quality newborn  
280 care. This study's findings about the 3 counties could be supported by the fact that these are  
281 underdeveloped counties that were considered disadvantaged regions by Kenya's presidential  
282 initiatives for improvement of the quality of maternal and child health services [49-51]. Such areas  
283 may not have attained quality health care services thus explaining the poor quality of neonatal care  
284 received. Such findings are also consistent with a study in Ethiopia that found the marginalization  
285 (disregard) of neonatal health services in rural and underdeveloped regions reducing the quality of  
286 neonatal health services in such areas [52]. Such regions need to be given priority when it comes  
287 to the distribution of newborn-related health care services by ministries of health in Kenya and  
288 other sub-Saharan countries.

289 Mothers who subscribed to the Christian or Muslim faith compared with those from other faiths,  
290 were more likely to report that their newborns had received quality newborn care. This may be  
291 because the biggest population in Kenya is made up of Christians and Muslims. Studies have  
292 observed that religion is a great predictor of neonatal health outcomes [53]. This could be explained  
293 by the positive impact of some religions as documented by Brelsford et al. [54] where some  
294 mothers were more likely to comply with newborn quality care practices as compared to other  
295 religions. This finding presents such denominations as a platform for presenting newborn health-  
296 related information to the populations through sensitization.

297 Furthermore, mothers who gave birth through cesarean section were less likely to report that their  
298 newborns had received quality newborn care when compared with those who gave birth through  
299 spontaneous vaginal delivery. This could be because mothers after cesarean section are less  
300 physically functioning as compared to those who have a safe vaginal delivery and hence are unable  
301 to cooperate with health workers fully in initiating interventions like timely breastfeeding and  
302 thermoregulation of neonates compromising the quality of neonatal care [55]. Studies have also  
303 associated the cesarian section with higher incidences of neonatal complications and mortality.

304 Such babies are prone to adverse conditions like concomitant diarrhea and acute respiratory  
305 infections [56, 57]. Therefore, the level of care needed by such babies may not be easily realizable  
306 in low-resource settings of Kenya, as compared to those that deliver vaginally. This calls for  
307 capacity building of health professionals by government and nongovernment stakeholders in  
308 delivering advanced neonatal interventions in facilities authorized to perform cesarian sections.

309 Mothers who gave birth in a non-government organization health facilities were more likely to  
310 report that their newborns had received quality newborn care compared with those who delivered  
311 from public and faith-based organizations. These results concur with results from other studies that  
312 found that public and private health facilities lack essential supplies and equipment needed to  
313 provide quality newborn care, and lack basic and effective aspects of essential newborn care like  
314 skin-to-skin contact between mother and babies as compared to other facilities[58, 59]. Scholars  
315 have highlighted the important role played by NGOs in providing quality health care and the need  
316 for government authorities to seek collaborations with such organizations [60, 61]. NGOs have  
317 been noted to have continuity of quality care which is affordable as compared to other facilities  
318 thereby necessitating authorities to facilitate a good environment for their operations[62]. NGOs  
319 provide quality health care since they focus their resources on delivering healthcare outcomes  
320 unlike governments that may focus on divergent political and social agendas when providing  
321 healthcare[63]

322 Mothers who spent an average of one hour accessing the health facilities compared with those who  
323 spent less than half an hour were more likely to report that their newborns had received quality  
324 newborn care. Unlike in this study, increased travel time to the delivery facility has been associated  
325 with an increased risk of neonatal mortality and complications [64]. Therefore, we recommend  
326 further studies by researchers to explore why mothers nearest the health facilities were more likely  
327 to report low-quality newborn care compared to those from far away from the health facilities. In  
328 sum, this study seems to suggest that facility-related and parental social factors are associated with  
329 receiving quality newborn care.

### 330 **Study Strengths and Limitations**

331 Data from the Kenya Demographic Health Survey 2022 was weighted and is nationally  
332 representative, therefore our results can be generalizable to all newborns in Kenya. Furthermore,  
333 DHS is known for high response rates and consistent quality data collection techniques across

334 states, thus our results are comparable to studies conducted elsewhere of the same design.  
335 However, because this study used a cross-sectional design, its conclusions are imprecise in  
336 demonstrating causality, and there is a possibility of recall bias from the participants because this  
337 study was based on self-reported data. Despite its limitations, this study presents useful  
338 information on factors influencing the quality of newborn care in Kenya.

### 339 **Conclusions**

340 This study revealed that the overall quality of newborn care was way below average, with some  
341 vital components of care scoring below the UN projected targets for SDG 3. These results highlight  
342 a gap in neonatal health care provision hence the need for responsible stakeholders to take action.  
343 This study also seems to suggest that facility-related and parental social factors are associated with  
344 receiving quality newborn care. The findings therefore show very low quality of neonatal care in  
345 some counties of Kenya prompting the government to prioritize universal health coverage hence  
346 even distribution of neonatal health services to such marginalized areas to improve accessibility  
347 and quality of neonatal health services. Emphasis should also be put on newborns born by the  
348 cesarian section since they are at high risk of receiving low quality newborn care. Therefore, this  
349 calls for capacity building of health professionals by government and nongovernment stakeholders  
350 in delivering advanced neonatal interventions in facilities authorized to perform cesarian sections.  
351 Government authorities and other stakeholders should also target religious denominations as a  
352 platform for sensitizing citizens about neonatal health care services. Collaborations between  
353 government authorities and NGO health facilities or newborn centers of excellence could also  
354 facilitate the provision of quality care.

### 355 **Abbreviations**

|             |                                 |
|-------------|---------------------------------|
| <b>KDHS</b> | Kenya Demographic Health Survey |
| <b>CI</b>   | Confidence Interval             |
| <b>AOR</b>  | Adjusted Odds Ratio             |
| <b>VIF</b>  | Variance Inflation Factor       |
| <b>COR</b>  | Crude Odds Ratio                |
| <b>DHS</b>  | Demographic Health Survey       |
| <b>EA</b>   | Enumeration area                |

|            |                           |
|------------|---------------------------|
| <b>OR</b>  | Odds Ratio                |
| <b>WHO</b> | World Health Organisation |

356

## 357 **DECLARATIONS**

### 358 **Acknowledgments**

359 We thank the DHS program for making the data available for this investigation.

### 360 **Competing interests**

361 All authors of this paper disclose that they have no competing interests.

### 362 **Consent for publication**

363 Not applicable.

### 364 **Funding**

365 This study received no funding.

### 366 **Ethics approval and consent to participate**

367 MEASURE DHS surveys uphold high universal moral standards, and the study process adheres to  
368 relevant regulations. The ICF Institutional Review Board assessed and approved the protocol for  
369 the 2022 KDHS survey. Human participants provided written informed permission, as did legally  
370 designated representatives of minor participants.

### 371 **Availability of data and materials**

372 This data is freely available upon request from the MEASURE DHS website (URL:  
373 <https://www.dhsprogram.com/data/available-datasets.cfm>). However, the researchers in this study  
374 have no right to share this data set with the public. Those interested in the data set may obtain it  
375 with full permission from the MEASURE DHS (URL:  
376 <https://www.dhsprogram.com/data/available-datasets.cfm>).

377

### 378 **Authors' contributions**

379 **Concept and proposal development:** John Baptist Asiimwe, Lilian Nuwabaine.

380 **Data analysis:** John Baptist Asiimwe, Lilian Nuwabaine, Joseph Kawuki, Quraish Sserwanja,

381 Angella Namulema, Mathius Amperiize, Earnest Amwiine, Shamim Nabidda, Imelda Nmaatovu

382 **Writing (original draft):** John Baptist Asiimwe, Lilian Nuwabaine, Joseph Kawuki, Quraish  
383 Sserwanja, Angella Namulema, Mathius Amperiize, Earnest Amwiine, Shamim Nabidda, Imelda  
384 Nmaatovu

385 **Writing (review and editing):** John Baptist Asiimwe, Lilian Nuwabaine, Joseph Kawuki, Quraish  
386 Sserwanja, Angella Namulema, Mathius Amperiize, Earnest Amwiine, Shamim Nabidda, Imelda  
387 Nmaatovu

### 388 **ORCID**

389 John Baptist Asiimwe: <https://orcid.org/0000-0003-0681-9204>

390 Lilian Nuwabaine: <https://orcid.org/0000-0003-3255-3876>

391 Joseph Kawuki: <https://orcid.org/0000-0002-2440-1111>

392 Quraish Sserwanja: <http://orcid.org/0000-0003-0576-4627>

### 393 **References**

- 394 1. Wilson AN, Spotswood N, Hayman G, Vogel J, Narasia J, Elijah A, et al. Improving the quality of  
395 maternal and newborn care in the Pacific region: a scoping review. *The Lancet Regional Health–Western*  
396 *Pacific*. 2020;3.
- 397 2. Arba A, Zana Z. Knowledge of essential newborn care and associated factors among nurses and  
398 midwives: a cross-sectional study at public health facilities in Wolaita zone, southern Ethiopia, 2019.  
399 *International journal of pediatrics*. 2020;2020.
- 400 3. Organization WH. WHO recommendations on intrapartum care for a positive childbirth  
401 experience: World Health Organization; 2018.
- 402 4. Berhanu D, Allen E, Beaumont E, Tomlin K, Tadesse N, Dinsa G, et al. Coverage of antenatal,  
403 intrapartum, and newborn care in 104 districts of Ethiopia: A before and after study four years after the  
404 launch of the national Community-Based Newborn Care programme. *PloS one*. 2021;16(8):e0251706.
- 405 5. McCauley H, Lowe K, Furtado N, Mangiaterra V, van den Broek N. Essential components of  
406 postnatal care—a systematic literature review and development of signal functions to guide monitoring  
407 and evaluation. *BMC Pregnancy and Childbirth*. 2022;22(1):448.
- 408 6. Maternal W. Child epidemiology estimation group child causes of death 2000–2017. WHO:  
409 Geneva, Switzerland. 2018.
- 410 7. Arunda MO. Improving neonatal survival in East Africa Analysis of maternal service utilization,  
411 effectiveness of care and risk factors for neonatal mortality in Kenya, Uganda, and Tanzania. 2021.
- 412 8. Neonatal mortality [Internet]. UNICEF. 2024 [cited 22nd March, 2024]. Available from:  
413 <https://data.unicef.org/topic/child-survival/neonatal-mortality/>.
- 414 9. Organization WH. Newborn Mortality. WHO; 2024.
- 415 10. Kenya National Bureau of Statistics. Kenya Demographic and Health Survey 2022 [cited 2024 09-  
416 01-2024]. Available from: <https://dhsprogram.com/pubs/pdf/PR143/PR143.pdf>.

- 417 11. Hug L, Sharrow D, Zhong K. United Nations inter-agency group for child mortality estimation.  
418 Levels & trends in child mortality. 2018.
- 419 12. Tibaijuka L, Bawakanya SM, Owaraganise A, Kyasimire L, Kumbakumba E, Boatman AA, et al.  
420 Incidence and predictors of preterm neonatal mortality at Mbarara Regional Referral Hospital in South  
421 Western Uganda. *PloS one*. 2021;16(11):e0259310.
- 422 13. Efa BW, Berhanie E, Desta KW, Hinkosa L, Fetensa G, Etafa W, et al. Essential new-born care  
423 practices and associated factors among post natal mothers in Nekemte City, Western Ethiopia. *PloS one*.  
424 2020;15(4):e0231354.
- 425 14. Asiime JB, Nyegenye W, Muyingo E. Trends and determinants of neonatal mortality in Uganda:  
426 analysis of the Uganda demographic and health surveys. *African Population Studies*. 2020;34(1).
- 427 15. Imbo AE, Mbutia EK, Ngotho DN. Determinants of Neonatal Mortality in Kenya: Evidence from  
428 the Kenya Demographic and Health Survey 2014. *Int J MCH AIDS*. 2021;10(2):287-95. Epub 2021/12/24.  
429 doi: 10.21106/ijma.508. PubMed PMID: 34938597; PubMed Central PMCID: PMCPMC8679594.
- 430 16. Saaka M, Iddrisu M. Patterns and determinants of essential newborn care practices in rural areas  
431 of northern Ghana. *International Journal of Population Research*. 2014;2014.
- 432 17. Roed MB, Engebretsen IMS, Mangeni R. Neonatal care practices in Buikwe District, Uganda: a  
433 qualitative study. *BMC Pregnancy and Childbirth*. 2021;21(1):1-10.
- 434 18. Kawaza K, Kinshella M-LW, Hiwa T, Njirammadzi J, Banda M, Vidler M, et al. Assessing quality of  
435 newborn care at district facilities in Malawi. *BMC Health Services Research*. 2020;20(1):1-11.
- 436 19. Enos JY, Amoako RD, Enos SK, Hayford B, Tette EM. Perspective Chapter: Challenges to Postnatal  
437 Care in Sub-Saharan Africa—A Review. *Contemporary Challenges in Postnatal Care*. 2024.
- 438 20. Kaur E, Heys M, Crehan C, Fitzgerald F, Chiume M, Chirwa E, et al. Persistent barriers to achieving  
439 quality neonatal care in low-resource settings: perspectives from a unique panel of frontline neonatal  
440 health experts. *Journal of Global Health Reports*. 2023;7.
- 441 21. Sunkwa-Mills G, Senah K, Tersbøl BP. Infection prevention and control in neonatal units: An  
442 ethnographic study of social and clinical interactions among healthcare providers and mothers in Ghana.  
443 *PloS one*. 2023;18(7):e0283647.
- 444 22. Organization WH. WHO recommendations on maternal and newborn care for a positive postnatal  
445 experience: World Health Organization; 2022.
- 446 23. Singh DR, Harvey CM, Bohara P, Nath D, Singh S, Szabo S, et al. Factors associated with newborn  
447 care knowledge and practices in the upper Himalayas. *PloS one*. 2019;14(9):e0222582.
- 448 24. Horwood C, Haskins L, Luthuli S, McKerrow N. Communication between mothers and health  
449 workers is important for quality of newborn care: a qualitative study in neonatal units in district hospitals  
450 in South Africa. *BMC pediatrics*. 2019;19:1-13.
- 451 25. Sanjel K, Onta SR, Amatya A, Basel P. Patterns and determinants of essential neonatal care  
452 utilization among underprivileged ethnic groups in Midwest Nepal: a mixed method study. *BMC*  
453 *pregnancy and childbirth*. 2019;19(1):1-10.
- 454 26. Batamuriza M, Uwingabire E, Oluyinka A. Essential newborn care among postnatal mothers at  
455 selected health centers in eastern province, Rwanda. *Rwanda Journal of Medicine and Health Sciences*.  
456 2020;3(2):139-51.
- 457 27. Alamneh Y, Adane F, Yirga T, Desta M. Essential newborn care utilization and associated factors  
458 in Ethiopia: a systematic review and meta-analysis. *BMC pregnancy and childbirth*. 2020;20:1-9.
- 459 28. Gebremedhin T, Atnafu A, Dellie E. Community-based newborn care utilisation and associated  
460 factors in Geze Gofa rural district, South Ethiopia: a community-based cross-sectional study. *BMJ open*.  
461 2020;10(8):e037792.
- 462 29. Zhao S, Zhang Y, Xiao AY, He Q, Tang K. Key factors associated with quality of postnatal care: a  
463 pooled analysis of 23 countries. *EClinicalMedicine*. 2023;62.



- 464 30. Bolan N, Cowgill KD, Walker K, Kak L, Shaver T, Moxon S, et al. Human resources for health-related  
465 challenges to ensuring quality newborn care in low-and middle-income countries: a scoping review. *Global*  
466 *Health: Science and Practice*. 2021;9(1):160-76.
- 467 31. Keene CM, Aluvaala J, Murphy GA, Abuya N, Gathara D, English M. Developing recommendations  
468 for neonatal inpatient care service categories: reflections from the research, policy and practice interface  
469 in Kenya. *BMJ global health*. 2019;4(2):e001195.
- 470 32. Saaka M, Iddrisu M. Patterns and determinants of essential newborn care practices in rural areas  
471 of northern Ghana. *International Journal of Population Research*. 2014;2014(1):404387.
- 472 33. Van den Broek N, Graham W. Quality of care for maternal and newborn health: the neglected  
473 agenda. *BJOG: An International Journal of Obstetrics & Gynaecology*. 2009;116:18-21.
- 474 34. Islam MA, Khan MS, Khan AA, Narapureddy BR, Lingala KVR, Nasir N, et al. Newborn Care Practices  
475 and Associated Factors Influencing Their Health in a Northern Rural India. *Children*. 2023;10(2):408.
- 476 35. Mahato P, van Teijlingen E, Simkhada P, Angell C. Determinants of quality of care and access to  
477 Basic Emergency Obstetric and neonatal care facilities and midwife-led facilities in low and middle-income  
478 countries: a systematic review. *J Asian Midwives*. 2018; 4: 25–61.
- 479 36. Alemu A, Eshete A. Newborn care practices and associated factors among lactating mothers at  
480 home in the rural districts of Gedeo Zone, southern Ethiopia. *Pediatric health, medicine and therapeutics*.  
481 2020:47-54.
- 482 37. Croft T, Marshall A, Allen C. *Guide to DHS statistics*. Rockville: ICF; 2018. 2018.
- 483 38. Zou D, Lloyd JE, Baumbusch JL. Using SPSS to analyze complex survey data: a primer. *Journal of*  
484 *Modern Applied Statistical Methods*. 2020;18(1):16.
- 485 39. Delele TG, Biks GA, Abebe SM, Kebede ZT. Perceived quality of essential newborn care  
486 implementation among health facility deliveries in North Gondar Zone, Northwest Ethiopia: a cross-  
487 sectional study. *Reproductive Health*. 2021;18:1-14.
- 488 40. Mersha A, Assefa N, Teji K, Shibiru S, Darghawth R, Bante A. Essential newborn care practice and  
489 its predictors among mother who delivered within the past six months in Chenchu District, Southern  
490 Ethiopia, 2017. *PloS one*. 2018;13(12):e0208984.
- 491 41. UNICEF. *Delivery care*. 2024. Epub January, 2024.
- 492 42. Talon PY, Saizonou J, Kpozèhouen A, Zannou RF, Ouendo E-M. Trends in the utilisation of skilled  
493 birth attendance among pregnant women in Benin, from 2001 to 2017-2018, and projections to 2030.  
494 *BMC Public Health*. 2023;23(1):874.
- 495 43. Mathewos Oridanigo E, Kassa B. Utilization of Skilled Birth Attendance among Mothers Who Gave  
496 Birth in the Last 12 Months in Kembata Tembaro Zone. *Advances in Medicine*. 2022;2022.
- 497 44. Peven K, Day LT, Bick D, Pursell E, Taylor C, Akuze J, et al. Household survey measurement of  
498 newborn postnatal care: coverage, quality gaps, and internal inconsistencies in responses. *Global Health:*  
499 *Science and Practice*. 2021;9(4):737-51.
- 500 45. Lizinde A, Suubi M. CORD CARE AND ITS ASSOCIATED FACTORS AMONG MOTHERS OF BUWAMBO  
501 VILLAGE, WAKISO DISTRICT. A CROSS-SECTIONAL DESCRIPTIVE STUDY. *Student's Journal of Health*  
502 *Research Africa*. 2023;4(6):12-.
- 503 46. Karim F, Billah SM, Chowdhury MAK, Zaka N, Manu A, Arifeen SE, et al. Initiation of breastfeeding  
504 within one hour of birth and its determinants among normal vaginal deliveries at primary and secondary  
505 health facilities in Bangladesh: A case-observation study. *PloS one*. 2018;13(8):e0202508.
- 506 47. Pamarthi K, Palli JK. Factors influencing early initiation of breast feeding among mothers in North  
507 Coastal Andhra Pradesh, India. *Int J Community Med Public Health*. 2019;6:4316-21.
- 508 48. Hassounah M, Dabbagh R, Younis A. Is the Frequency of Postpartum Breastfeeding Counseling  
509 Associated with Exclusive Breastfeeding at Six Months? An Analytical Cross-Sectional Study. *Children*.  
510 2023;10(7):1141.



- 511 49. Kenyatta U. Speech by HE Uhuru Kenyatta, CGH, President and Commander in Chief of the  
512 defence forces of the Republic of Kenya on the occasion of the 5th meeting, 2nd Session of the 3rd  
513 Assembly, Arusha, Tanzania 25th March 2014. 2014.
- 514 50. Gitobu CM, Gichangi PB, Mwanda WO. The effect of Kenya's free maternal health care policy on  
515 the utilization of health facility delivery services and maternal and neonatal mortality in public health  
516 facilities. *BMC pregnancy and childbirth*. 2018;18:1-11.
- 517 51. Samwel A, Emmanuel BK, Sylvester K. Rural Development Programs in Kenya: Challenges Facing  
518 Constituency Development Fund in North Mugirango/Borabu Constituency. *Asian Journal of Social  
519 Sciences & Humanities Vol.* 2015;4(4).
- 520 52. Yitbarek K, Hurlburt S, Hagen TP, Berhane M, Abraham G, Adamu A, et al. Inequitable Utilization  
521 of Neonatal Health Services in Southwest Ethiopia: The Effects of Socioeconomic Disparities. *INQUIRY: The  
522 Journal of Health Care Organization, Provision, and Financing*. 2021;58:00469580211018290.
- 523 53. Sanjel K, Onta SR, Amatya A, Basel P. Patterns and determinants of essential neonatal care  
524 utilization among underprivileged ethnic groups in Midwest Nepal: a mixed method study. *BMC  
525 pregnancy and childbirth*. 2019;19:1-10.
- 526 54. Brelsford GM, Ramirez J, Veneman K, Doheny KK. Sacred spaces: religious and secular coping and  
527 family relationships in the neonatal intensive care unit. *Advances in Neonatal Care*. 2016;16(4):315-22.
- 528 55. Reghunath D, Sangeetha C. A Comparative Study To Assess The Quality Of Life Among Mothers  
529 After Normal Vaginal Delivery And Caesarean Section At A Selected Hospital, Bangalore. *Int J Health Sci  
530 Res*. 2019;9(8):348-52.
- 531 56. Gondwe T, Betha K, Kusneniwar G, Bunker CH, Tang G, Simhan H, et al. Adverse infant outcomes  
532 associated with caesarean section delivery in India. *International Health*. 2020;12(5):411-6.
- 533 57. Martínez-Perez O, Vouga M, Melguizo SC, Acebal LF, Panchaud A, Muñoz-Chápuli M, et al.  
534 Association between mode of delivery among pregnant women with COVID-19 and maternal and neonatal  
535 outcomes in Spain. *Jama*. 2020;324(3):296-9.
- 536 58. Kc A, Singh DR, Upadhyaya MK, Budhathoki SS, Gurung A, Målqvist M. Quality of care for maternal  
537 and newborn health in health facilities in Nepal. *Maternal and Child Health Journal*. 2020;24:31-8.
- 538 59. Atiqzai F, Manalai P, Amin SS, Edmond KM, Naziri M, Soroush MS, et al. Quality of essential  
539 newborn care and neonatal resuscitation at health facilities in Afghanistan: a cross-sectional assessment.  
540 *BMJ open*. 2019;9(8):e030496.
- 541 60. Sanadgol A, Doshmangir L, Khodayari-Zarnaq R, Sergeevich Gordeev V. Role of non-governmental  
542 organizations in moving toward universal health coverage: A case study in Iran. *Frontiers in Public Health*.  
543 2022;10:985079.
- 544 61. Besançon S, Sidibé A, Sow DS, Sy O, Ambard J, Yudkin JS, et al. The role of non-governmental  
545 organizations in strengthening healthcare systems in low-and middle-income countries: Lessons from  
546 Santé Diabète in Mali. *Global Health Action*. 2022;15(1):2061239.
- 547 62. Bhuiyan MI, Haque A. Role of NGOs in providing available and affordable health care services to  
548 the slum people in Dhaka. *Clinical Epidemiology and Global Health*. 2024;25:101478.
- 549 63. Sanadgol A, Doshmangir L, Majdzadeh R, Gordeev VS. Engagement of non-governmental  
550 organisations in moving towards universal health coverage: a scoping review. *Globalization and health*.  
551 2021;17:1-19.
- 552 64. Örtqvist AK, Haas J, Ahlberg M, Norman M, Stephansson O. Association between travel time to  
553 delivery unit and unplanned out-of-hospital birth, infant morbidity and mortality: a population-based  
554 cohort study. *Acta obstetricia et gynecologica Scandinavica*. 2021;100(8):1478-89.

555
